# Supplementary material for: Horizontal and vertical structure of reactive bromine events probedby bromine monoxide MAX-DOAS spectroscopy
Source: Copernicus journal article supplement (doi:10.5194/acp-2017-187), 2017-03-03
Supplement: Supplementary file 1 [file acp-2017-187-supplement.zip]

Archive with 2 entries (2 files):
- BROMEX_animate.gif
- BROMEX-Gradients-28Feb2017-supplement.pdf
