# Supplementary figures and images for: Horizontal and vertical structure of reactive bromine events probedby bromine monoxide MAX-DOAS spectroscopy
Source: Copernicus journal article supplement (doi:10.5194/acp-2017-187), 2017-03-03

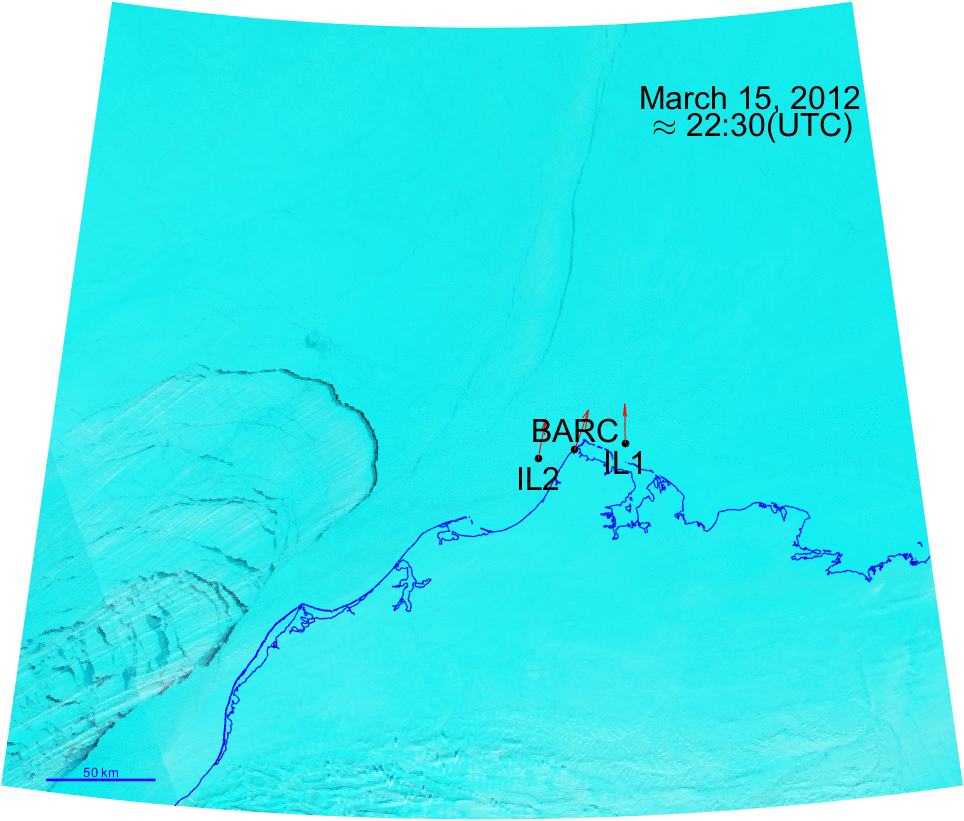

Supplement: Supplementary file 1 [file acp-2017-187-supplement.zip › BROMEX_animate.gif]
